# Supplementary material for: Cellular Mechanisms Triggered by the Cotreatment of Resveratrol and Doxorubicin in Breast Cancer: A Translational In Vitro–In Silico Model
Source: PubMed Central journal article supplement (PMC7654215; doi:10.1155/2020/5432651), 2020-11-01

A

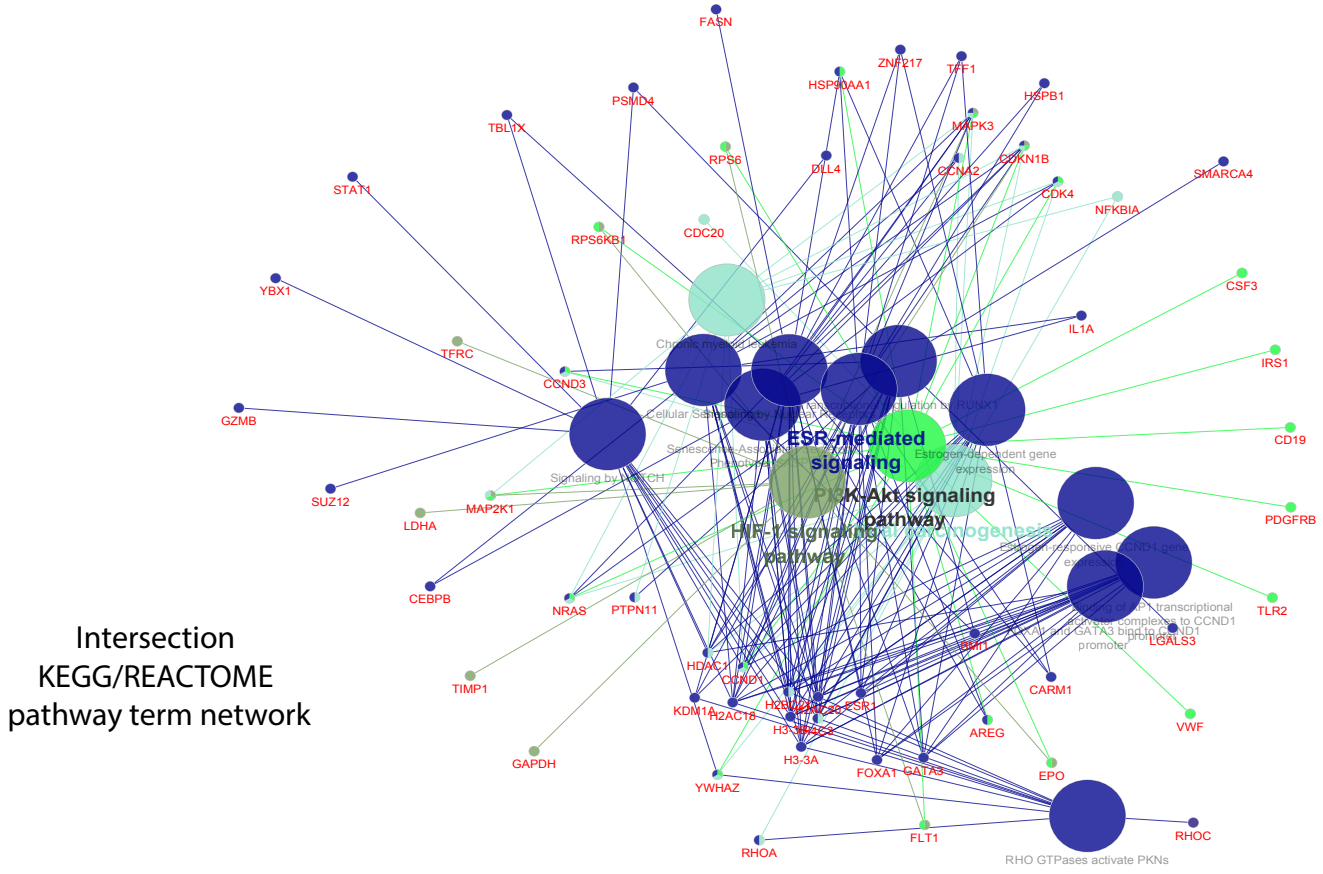

B

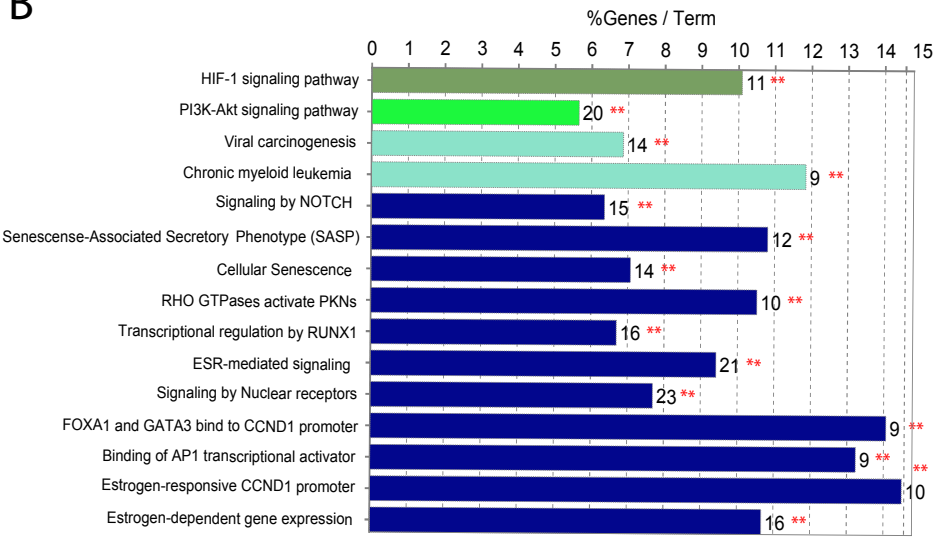

C

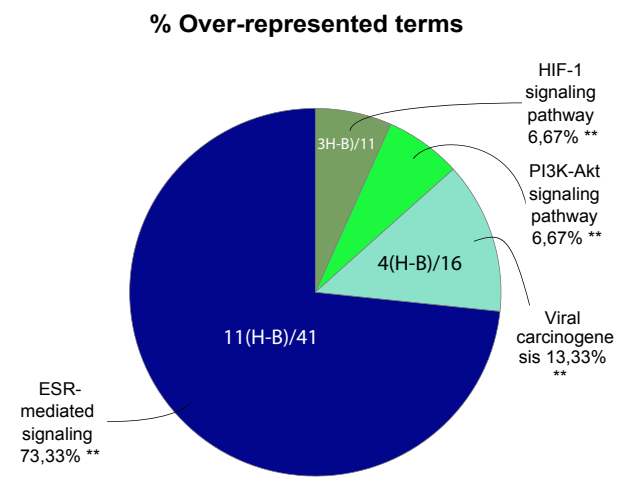

Supplement: 5432651.f3.pdf [file 5432651.f3.pdf]
