# Supplementary material for: Cellular Mechanisms Triggered by the Cotreatment of Resveratrol and Doxorubicin in Breast Cancer: A Translational In Vitro–In Silico Model
Source: PubMed Central journal article supplement (PMC7654215; doi:10.1155/2020/5432651), 2020-11-01

A

BT483  
1080 nodes  
17186 edges

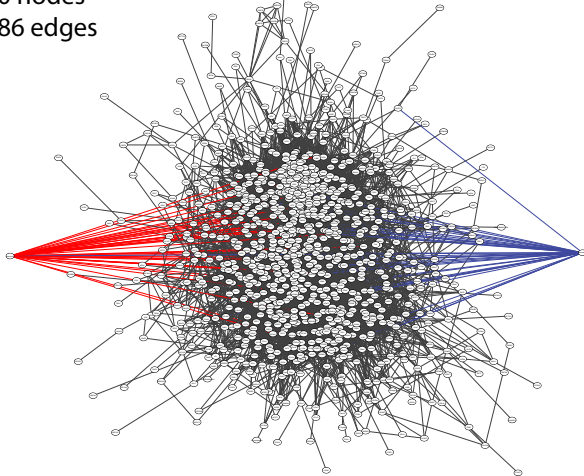

MDA-MD-231  
1656 nodes  
28519 edges

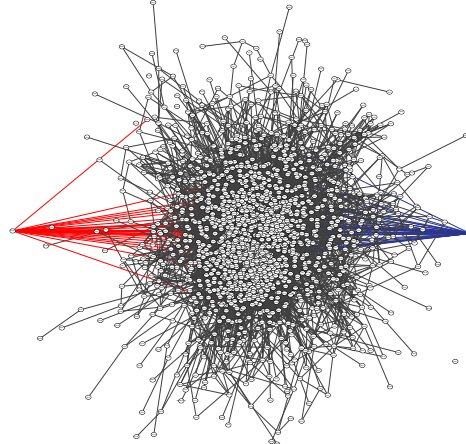

B

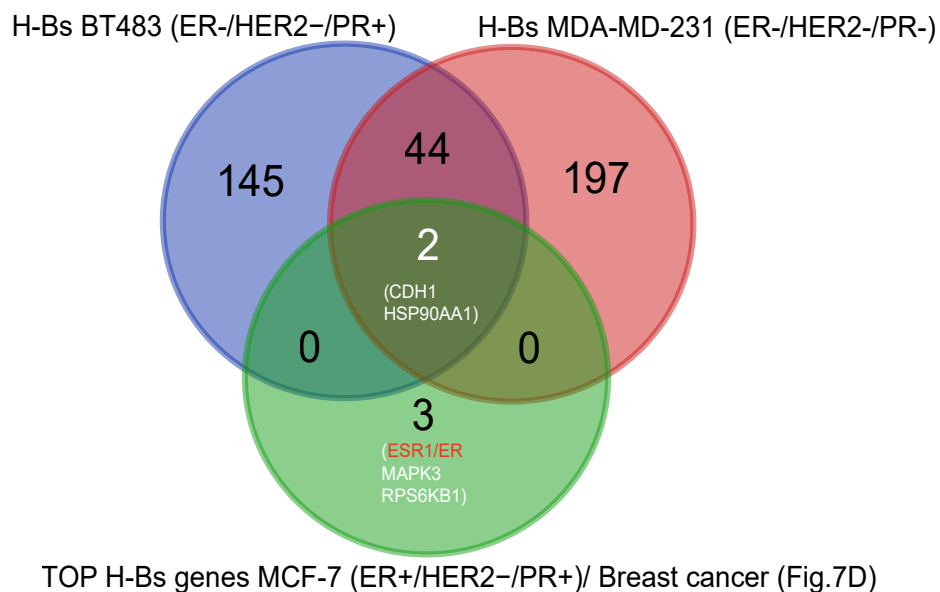

Supplement: 5432651.f5.pdf [file 5432651.f5.pdf]
