# Supplementary material for: Cellular Mechanisms Triggered by the Cotreatment of Resveratrol and Doxorubicin in Breast Cancer: A Translational In Vitro–In Silico Model
Source: Hindawi journal article supplement (doi:10.1155/2020/5432651), 2020-11-01

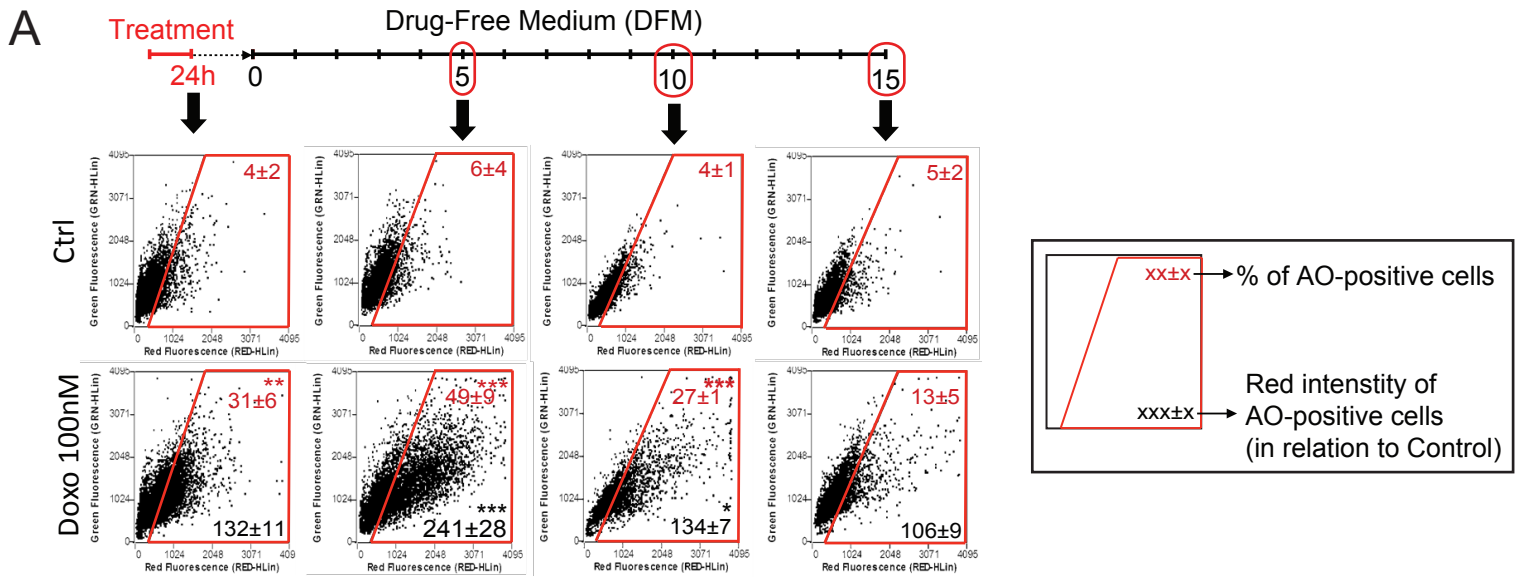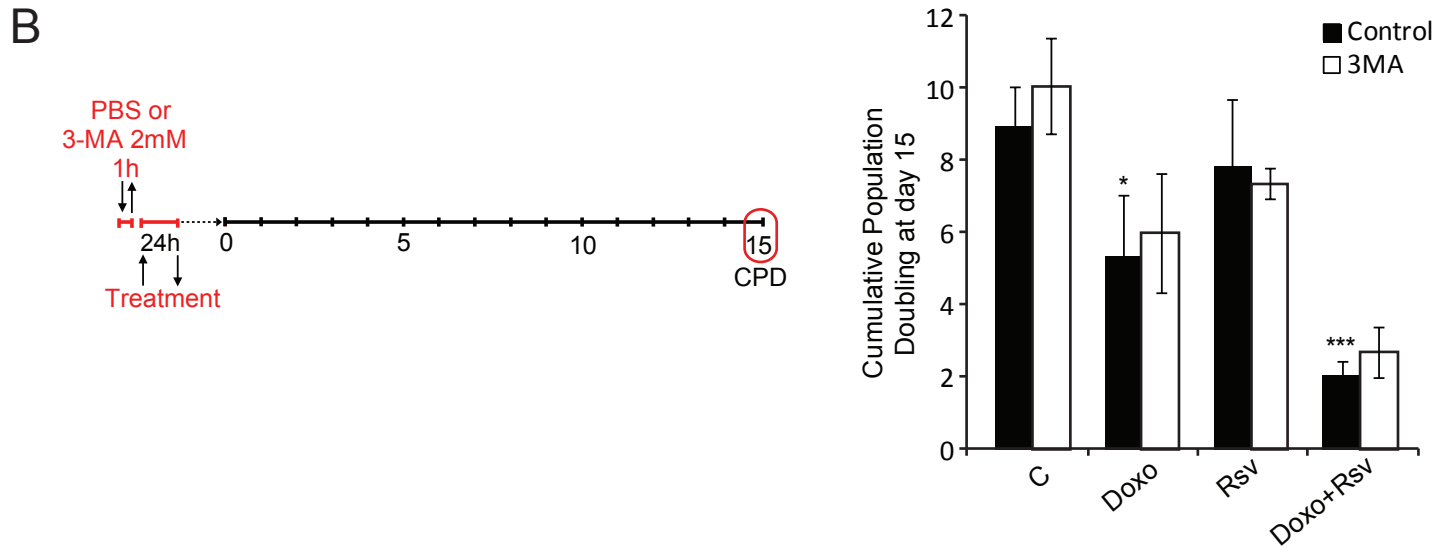

Supplement: f2 [file 5432651.f2.pdf]
